# Supplementary material for: The role of Anaphase Promoting Complex activation, inhibition and substrates in cancer development and progression
Source: PubMed Central journal article supplement (PMC7467358; doi:10.18632/aging.103792), 2020-08-15
Supplement: aging-12-103792-s001..pdf [file aging-12-103792-s001..pdf]

## SUPPLEMENTARY FIGURES

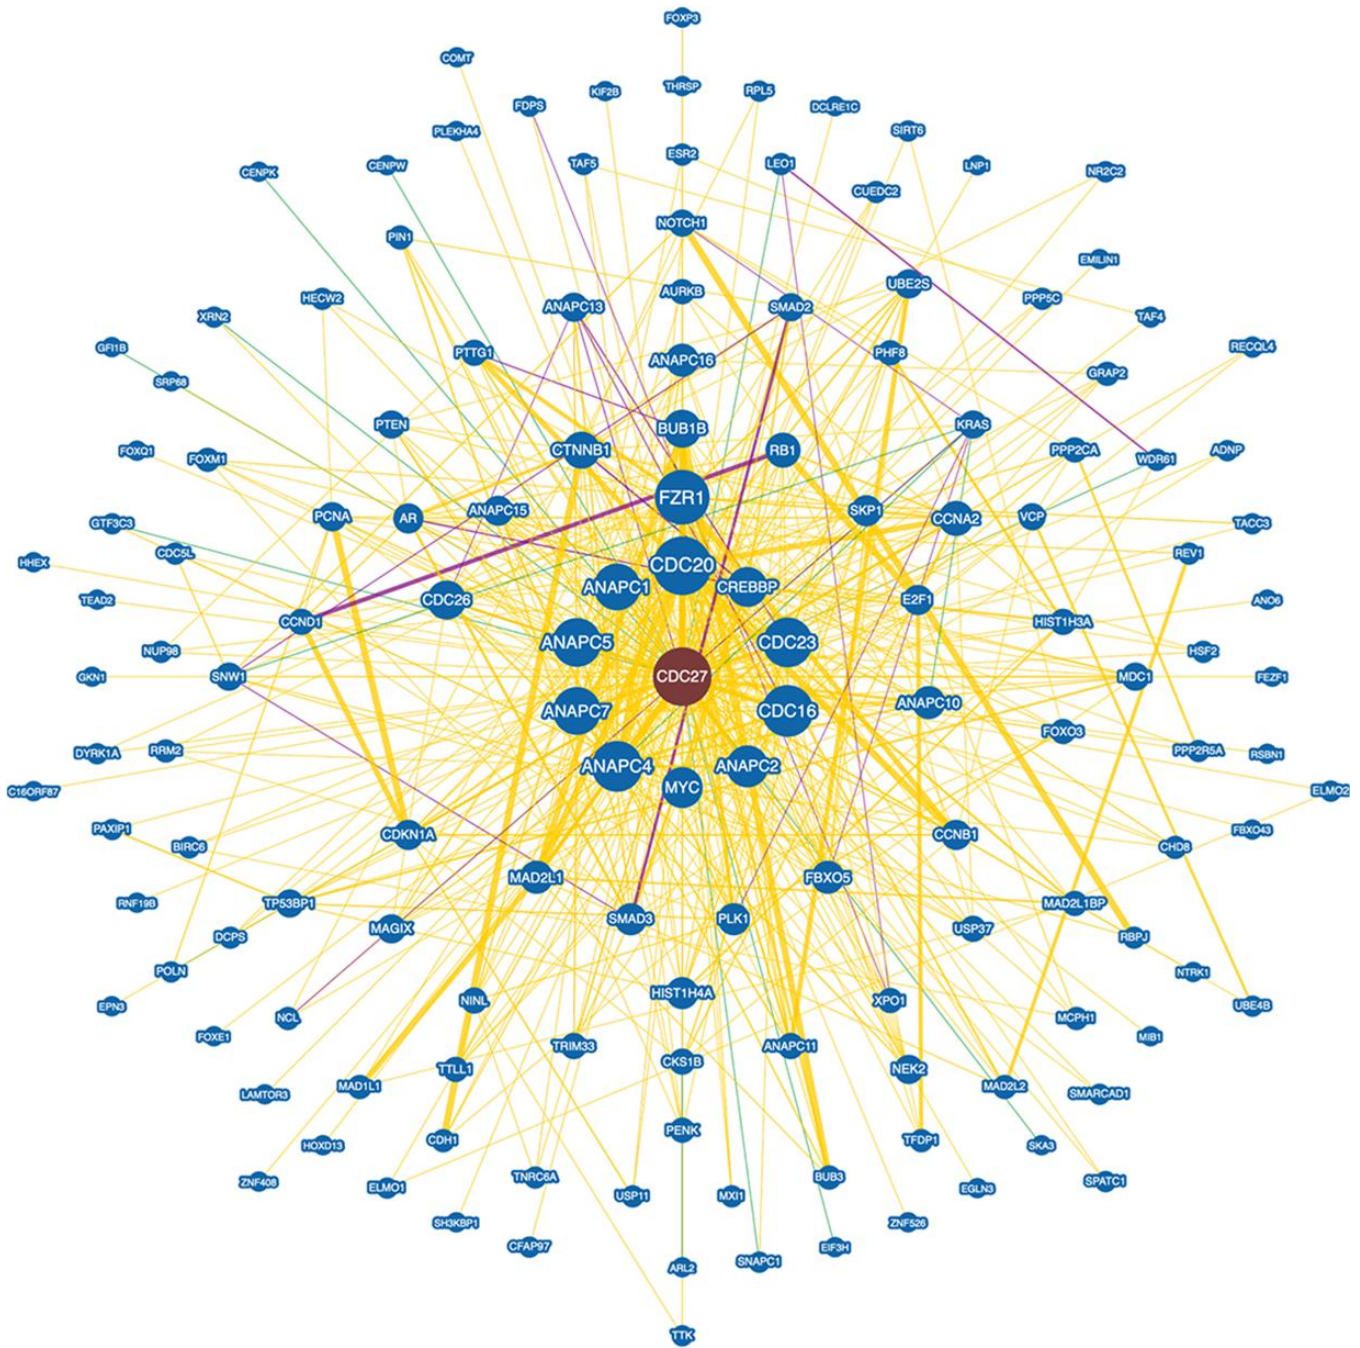

**Supplementary Figure 1.** Raw data from a BioGRID search using the search word **CDC27**. Minimal evidence was set to 1 for all searches. Nonhuman interactors and homologs were removed from the results. The same criteria was used for all searches.

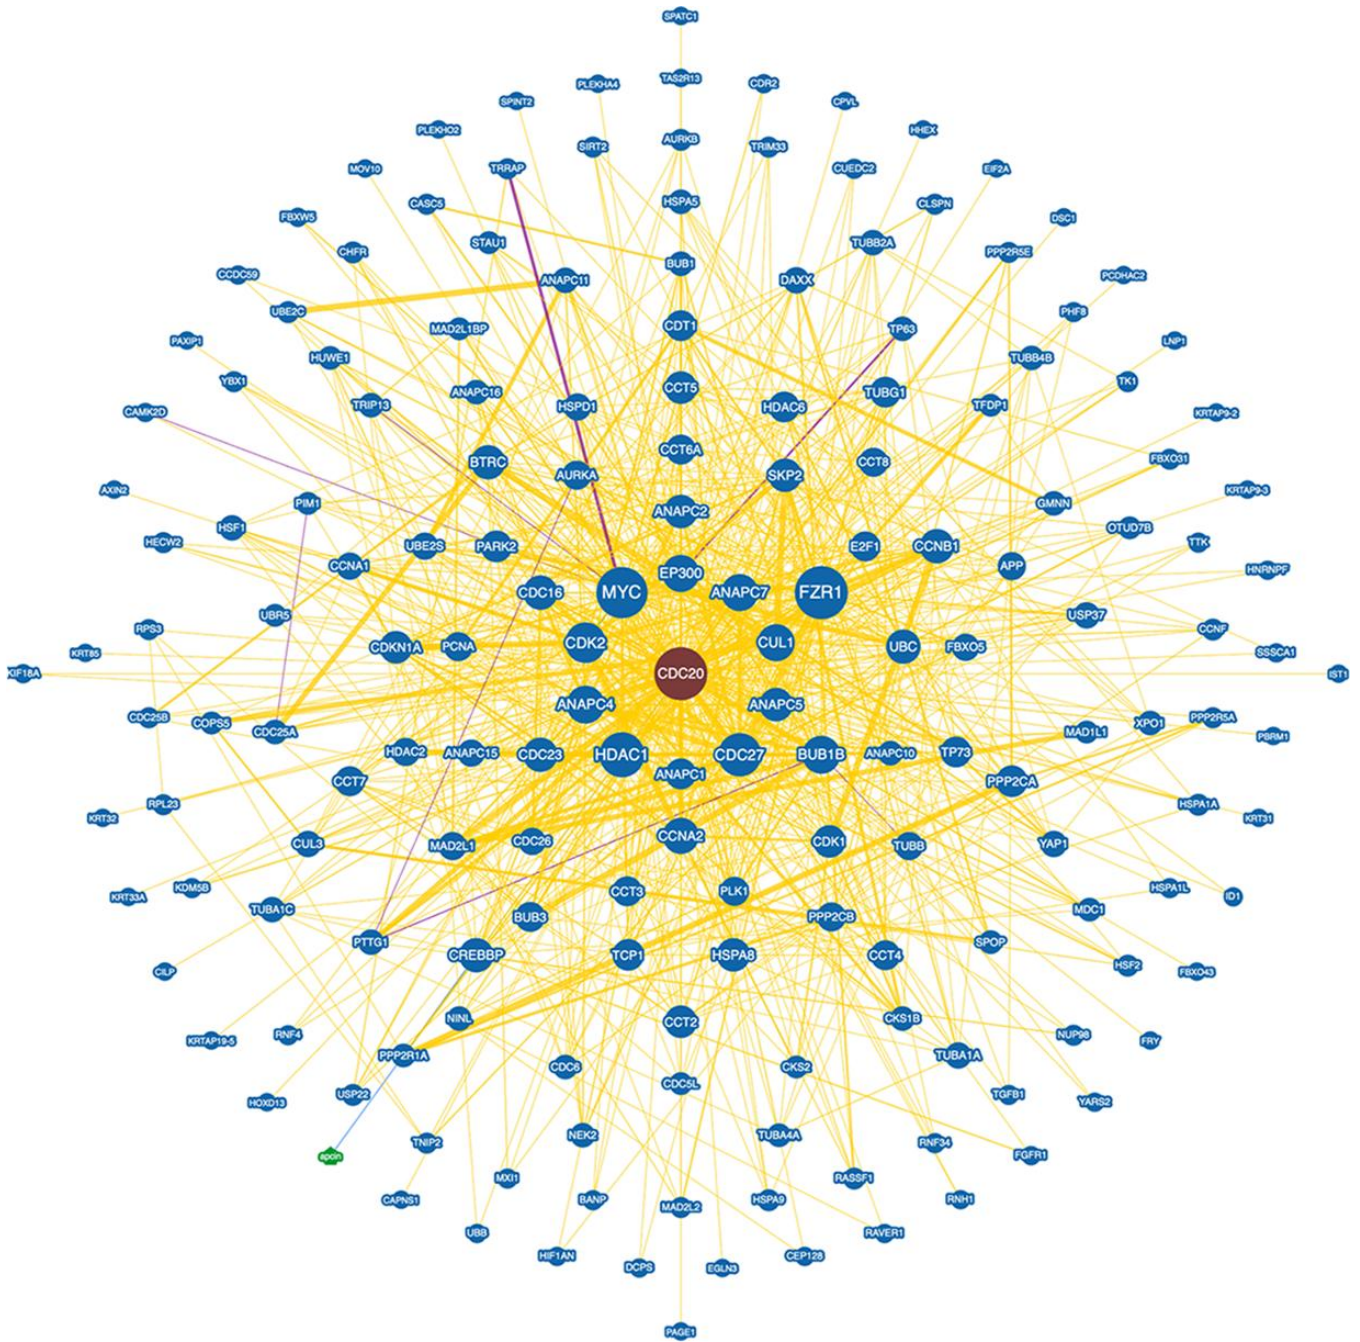

Supplementary Figure 2. Raw data from a BioGRID search using the search word FZR1.



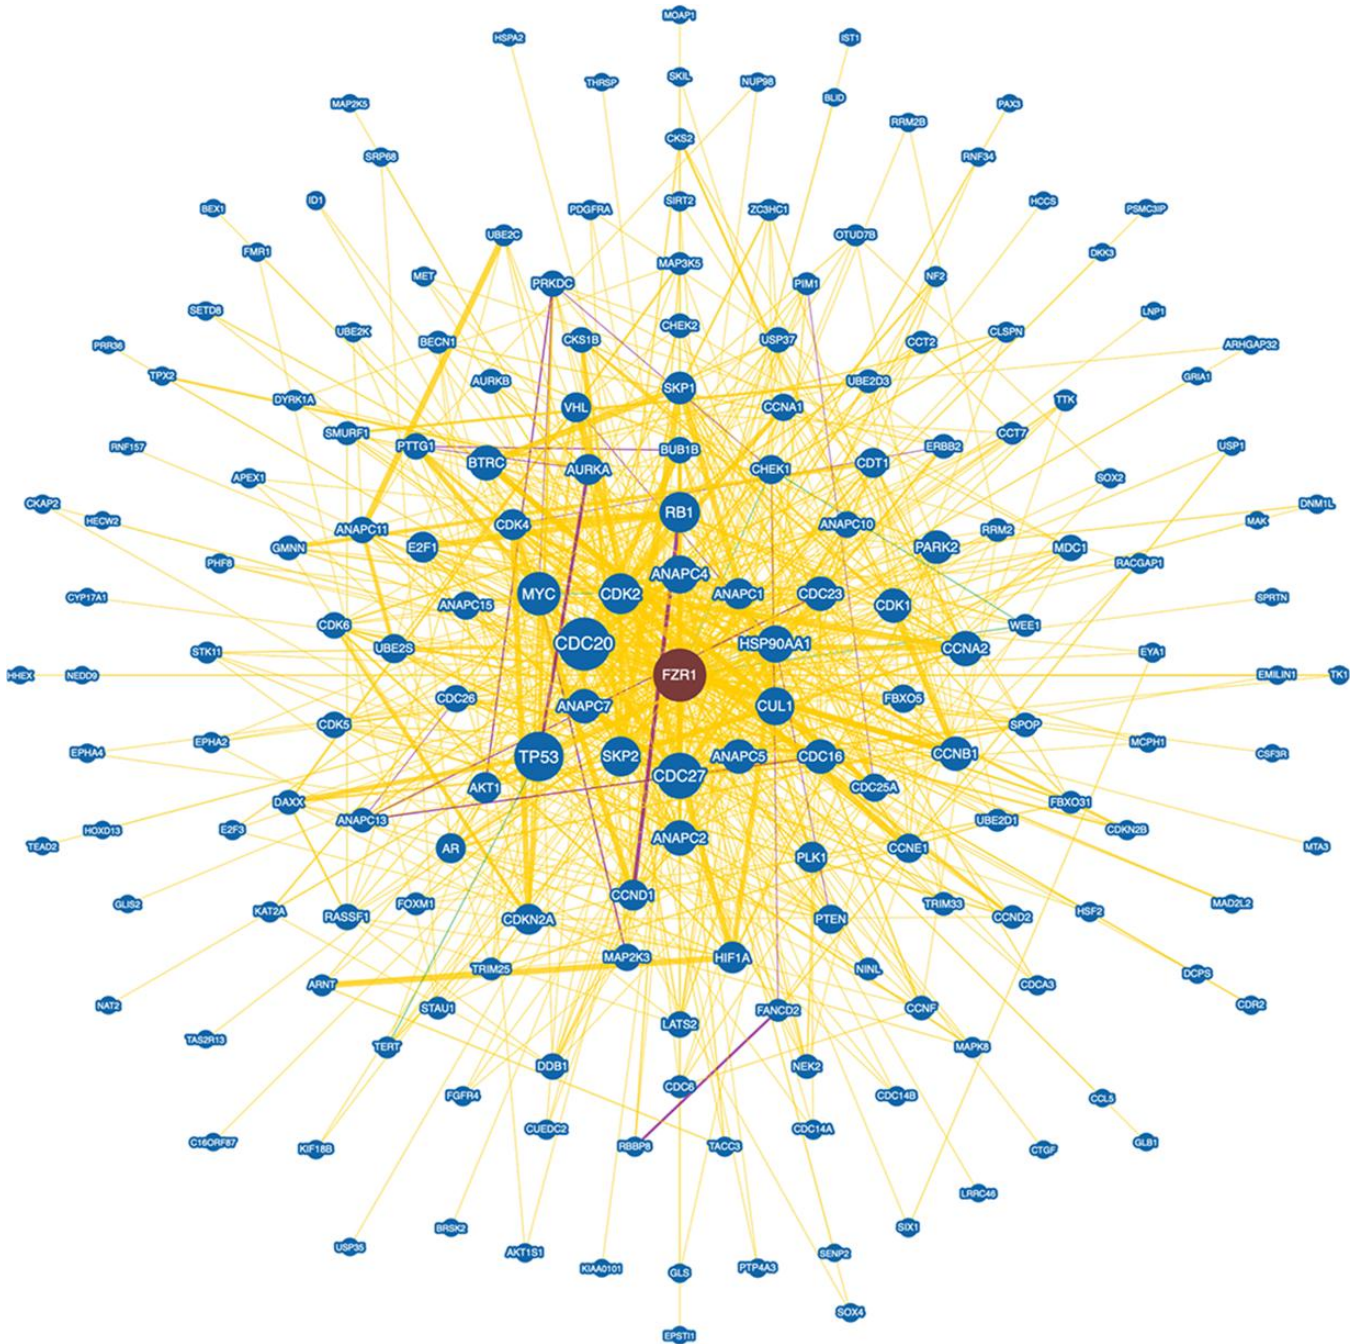

Supplementary Figure 3. Raw data from a BioGRID search using the search word CDC20.
